# Supplementary material for: Unravelling the physisorption characteristics of H2S molecule on biaxially strained single-layer MoS2
Source: Royal Society of Chemistry journal article supplement (doi:10.1039/c9na00069k), 2019-01-01
Supplement: c9na00069k1.pdf [file c9na00069k1.pdf]

### Supplementary Information

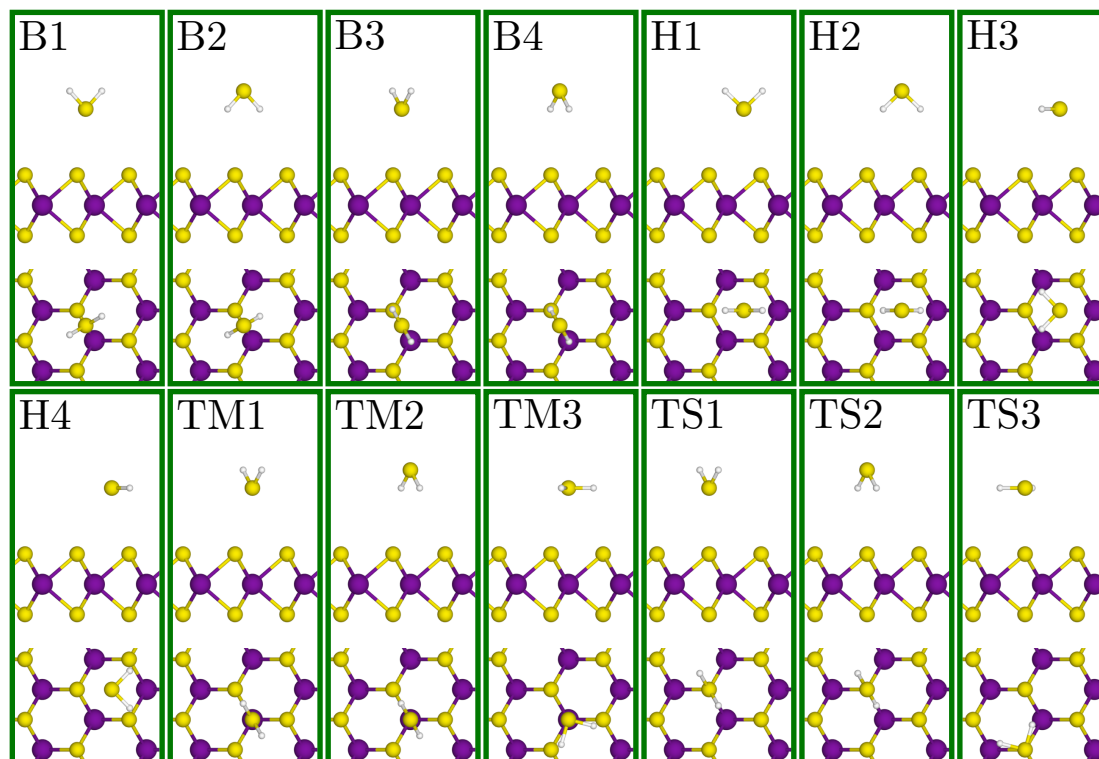

**Fig. S1** Initial configurations for the adsorption of H<sub>2</sub>S molecule above the SL-MoS<sub>2</sub> surface. Purple (yellow) atoms represent Molybdenum (Sulfur).

**Table S1** Zero-crossing energies for the real part of the dielectric function spectra ( $\epsilon_1$ ) for pristine and H<sub>2</sub>S adsorbed SL-MoS<sub>2</sub> under different strains and concentrations of gas molecules.

| System              | Strain (%) | Num. of H <sub>2</sub> S Mol. | 1st    | 2nd   | 3rd   | 4th   | 5th   | 6th   | 7th   | 8th   | 9th   | 10th  |
|---------------------|------------|-------------------------------|--------|-------|-------|-------|-------|-------|-------|-------|-------|-------|
| SL-MoS <sub>2</sub> | -8         | None                          | 4.641  | 6.591 | 7.384 | 8.321 | 12.33 | 13.11 | 15.32 | -     | -     | -     |
|                     |            | 1                             | 4.608  | 6.555 | 7.361 | 12.34 | 13.18 | 15.36 | 16.36 | -     | -     | -     |
|                     |            | 2                             | 4.585  | 6.524 | 7.342 | 12.36 | 13.26 | 15.4  | 16.41 | -     | -     | -     |
|                     |            | 3                             | 4.565  | 6.489 | 7.323 | 12.39 | 13.3  | 15.48 | 16.5  | -     | -     | -     |
|                     |            | 4                             | 4.525  | 6.34  | 7.325 | 12.37 | 13.41 | 15.54 | 16.49 | -     | -     | -     |
|                     | -6         | None                          | 4.657  | 7.298 | 7.59  | 8.181 | 12.99 | 13.73 | 15.11 | 15.98 | -     | -     |
|                     |            | 1                             | 4.642  | 6.493 | 7.274 | 8.08  | 13.01 | 13.71 | 15.17 | 16.03 | -     | -     |
|                     |            | 2                             | 4.629  | 6.45  | 7.248 | 13.06 | 15.24 | 16.13 | -     | -     | -     | -     |
|                     |            | 3                             | 4.622  | 6.409 | 7.212 | 13.09 | 16.35 | -     | -     | -     | -     | -     |
|                     |            | 4                             | 4.539  | 6.292 | 7.229 | 8.112 | 12.22 | 13.1  | 16.34 | -     | -     | -     |
|                     | -4         | None                          | 4.693  | 7.238 | 8.059 | 12.83 | 13.74 | 14.44 | 14.94 | 15.56 | -     | -     |
|                     |            | 1                             | 4.682  | 7.216 | 7.987 | 12.85 | 13.75 | 14.53 | 14.99 | 15.68 | -     | -     |
|                     |            | 2                             | 4.664  | 7.193 | 7.849 | 12.87 | 13.76 | 16.02 | -     | -     | -     | -     |
|                     |            | 3                             | 4.645  | 7.167 | 12.91 | 16.11 | -     | -     | -     | -     | -     | -     |
|                     |            | 4                             | 4.605  | 6.193 | 7.177 | 8.12  | 12.93 | 16.11 | -     | -     | -     | -     |
|                     | -2         | None                          | 4.665  | 7.138 | 8.276 | 13.72 | 14.4  | 14.83 | 15.47 | -     | -     | -     |
|                     |            | 1                             | 4.652  | 7.127 | 7.821 | 8.238 | 13.76 | 14.47 | 14.86 | 15.55 | -     | -     |
|                     |            | 2                             | 4.643  | 7.114 | 7.696 | 8.194 | 14.53 | 14.9  | 15.68 | -     | -     | -     |
|                     |            | 3                             | 4.629  | 7.101 | 7.542 | 7.565 | 7.581 | 15.79 | -     | -     | -     | -     |
|                     |            | 4                             | 4.586  | 6.093 | 7.109 | 7.507 | 8.24  | 15.87 | -     | -     | -     | -     |
|                     | 0          | None                          | 3.06   | 4.516 | 5.438 | 7.058 | 7.542 | 8.07  | 14.15 | 15.45 | -     | -     |
|                     |            | 1                             | 3.009  | 4.517 | 5.434 | 7.037 | 7.469 | 7.991 | 14.33 | 15.37 | -     | -     |
|                     |            | 2                             | 2.984  | 4.519 | 5.43  | 7.016 | 7.937 | 14.38 | 15.28 | -     | -     | -     |
|                     |            | 3                             | 2.969  | 4.522 | 5.425 | 6.986 | 7.897 | 11.98 | 14.42 | 15.2  | -     | -     |
|                     |            | 4                             | 2.968  | 4.476 | 5.403 | 5.796 | 7.05  | 7.447 | 7.921 | 11.9  | 14.49 | 15.36 |
|                     | 2          | None                          | 3.005  | 5.372 | 6.97  | 7.966 | 13.99 | 15.23 | -     | -     | -     | -     |
|                     |            | 1                             | 2.988  | 5.366 | 6.82  | 6.927 | 7.738 | 13.99 | 15.2  | -     | -     | -     |
|                     |            | 2                             | 2.971  | 5.36  | 6.787 | 7.681 | 14    | 15.17 | -     | -     | -     | -     |
|                     |            | 3                             | 2.954  | 5.353 | 6.76  | 7.647 | 11.99 | 14    | 15.13 | -     | -     | -     |
|                     |            | 4                             | 2.941  | 5.339 | 6.74  | 6.96  | 7.682 | 11.9  | 14.08 | 14.39 | 15.2  | -     |
|                     | 4          | None                          | 2.84   | 5.313 | 5.815 | 6.732 | 7.718 | 13.84 | -     | -     | -     | -     |
|                     |            | 1                             | 2.839  | 5.309 | 5.816 | 6.69  | 7.687 | 13.84 | -     | -     | -     | -     |
|                     |            | 2                             | 2.835  | 5.305 | 5.816 | 6.655 | 7.662 | 13.86 | -     | -     | -     | -     |
|                     |            | 3                             | 2.826  | 5.299 | 5.815 | 6.629 | 7.638 | 11.98 | 13.87 | -     | -     | -     |
|                     |            | 4                             | 2.808  | 5.29  | 5.803 | 6.67  | 7.683 | 13.96 | 14.73 | -     | -     | -     |
|                     | 6          | None                          | 2.685  | 5.152 | 5.559 | 6.539 | 7.508 | 13.65 | -     | -     | -     | -     |
|                     |            | 1                             | 2.689, | 5.16  | 5.558 | 6.508 | 7.464 | 13.64 | -     | -     | -     | -     |
|                     |            | 2                             | 2.693, | 5.554 | 6.477 | 7.427 | 13.62 | -     | -     | -     | -     | -     |
|                     |            | 3                             | 2.697, | 5.548 | 6.453 | 7.393 | 11.97 | 13.58 | -     | -     | -     | -     |
|                     |            | 4                             | 2.693, | 5.537 | 7.368 | -     | -     | -     | -     | -     | -     | -     |
| 8                   | None       | 2.526,                        | 5.366  | 7.237 | 14.11 | -     | -     | -     | -     | -     | -     |       |
|                     | 1          | 2.532                         | 5.364  | 7.212 | -     | -     | -     | -     | -     | -     | -     |       |
|                     | 2          | 2.539                         | 5.362  | 7.192 | -     | -     | -     | -     | -     | -     | -     |       |
|                     | 3          | 2.546                         | 5.358  | 7.176 | -     | -     | -     | -     | -     | -     | -     |       |
|                     | 4          | 2.549                         | 5.351  | 7.159 | -     | -     | -     | -     | -     | -     | -     |       |

**Table S2** Energies and (relative) intensities of the first ten peaks in the EEL spectra for different strains and concentrations of H<sub>2</sub>S molecules introduced to SL-MoS<sub>2</sub> sheet.

| System              | Strain (%) | Num. of H <sub>2</sub> S Mol. | 1st           | 2nd           | 3rd           | 4th           | 5th           | 6th           | 7th           | 8th           | 9th           | 10th          |               |
|---------------------|------------|-------------------------------|---------------|---------------|---------------|---------------|---------------|---------------|---------------|---------------|---------------|---------------|---------------|
| -8                  |            | None                          | (16.94,2.514) | (16.41,2.404) | (16.57,2.237) | (15.35,2.096) | (17.92,1.897) | (18.5,1.834)  | (18.8,1.824)  | (18.16,1.768) | (15.79,1.483) | (17.35,1.441) |               |
|                     |            | 1                             | (16.94,2.571) | (16.42,2.35)  | (16.6,2.288)  | (17.94,2.012) | (15.36,1.998) | (18.5,1.914)  | (18.8,1.895)  | (18.76,1.89)  | (18.76,1.89)  | (18.66,1.867) | (18.33,1.729) |
|                     |            | 2                             | (16.96,2.611) | (16.63,2.351) | (16.44,2.29)  | (17.96,2.138) | (18.52,2.003) | (18.72,1.983) | (18.76,1.979) | (18.68,1.978) | (18.68,1.978) | (18.62,1.967) | (15.37,1.892) |
|                     |            | 3                             | (17.02,2.653) | (16.64,2.394) | (17.96,2.24)  | (18.52,2.123) | (18.64,2.086) | (18.68,2.086) | (18.33,1.91)  | (17.53,1.826) | (17.53,1.826) | (15.39,1.776) | (20.36,1.425) |
| -6                  |            | None                          | (17.2,5.38)   | (16.66,2.321) | (17.96,2.268) | (18.52,2.201) | (18.7,2.161)  | (18.66,2.158) | (18.74,2.158) | (17.51,1.874) | (15.4,1.694)  | (20.36,1.489) |               |
|                     |            | 1                             | (16.76,2.392) | (16.36,2.382) | (16.09,2.061) | (17.58,1.854) | (18.58,1.831) | (18.54,1.827) | (17.94,1.817) | (17.94,1.817) | (15.16,1.675) | (15.62,1.6)   | (18.17,1.583) |
|                     |            | 2                             | (16.78,2.436) | (16.37,2.39)  | (17.6,1.952)  | (18.58,1.929) | (18.54,1.921) | (17.92,1.905) | (18.17,1.667) | (18.17,1.667) | (15.17,1.621) | (15.64,1.554) | (17.15,1.522) |
|                     |            | 3                             | (16.8,2.473)  | (16.39,2.38)  | (17.6,2.065)  | (18.58,2.018) | (18.54,2.011) | (17.92,2.007) | (18.17,1.763) | (18.17,1.763) | (17.17,1.661) | (15.18,1.556) | (15.64,1.502) |
| -4                  |            | None                          | (16.8,2.511)  | (16.45,2.355) | (17.6,2.17)   | (17.92,2.102) | (18.56,2.081) | (18.6,2.078)  | (18.52,2.077) | (18.48,2.071) | (18.15,1.874) | (17.17,1.789) |               |
|                     |            | 1                             | (16.82,2.443) | (16.56,2.293) | (17.68,2.216) | (17.94,2.183) | (18.56,2.182) | (18.6,2.177)  | (18.52,2.174) | (18.15,1.972) | (17.17,1.754) | (15.23,1.421) |               |
|                     |            | 2                             | (16.1,2.364)  | (16.56,2.113) | (18.3,1.972)  | (15.68,1.836) | (17.42,1.803) | (17.04,1.795) | (17.7,1.702)  | (17.7,1.702)  | (17.19,1.698) | (16.81,1.624) | (8.62,1.575)  |
|                     |            | 3                             | (16.16,2.342) | (16.56,2.133) | (18.3,2.057)  | (17.04,1.905) | (17.4,1.9)    | (15.73,1.807) | (16.81,1.714) | (17.93,1.55)  | (14.99,1.406) | (8.6,1.317)   |               |
| 0                   |            | None                          | (16.22,2.332) | (16.56,2.169) | (18.32,2.127) | (17.4,2.023)  | (17.04,1.994) | (16.81,1.808) | (17.93,1.643) | (15.1,354)    | (19.82,1.284) | (19.21,1.235) |               |
|                     |            | 1                             | (16.26,2.313) | (16.58,2.216) | (18.34,2.193) | (17.42,2.129) | (17.04,2.071) | (17.93,1.735) | (19.82,1.351) | (19.56,1.296) | (15,1,295)    | (19.25,1.293) |               |
|                     |            | 2                             | (18.32,2.287) | (16.27,2.248) | (17.5,2.195)  | (17.46,2.194) | (17.54,2.193) | (16.58,2.144) | (17.08,2.006) | (17.95,1.821) | (19.84,1.395) | (19.56,1.376) |               |
|                     |            | 3                             | (15.96,2.358) | (18.1,2.058)  | (18.14,2.053) | (18.06,2.051) | (8.28,1.948)  | (16.92,1.945) | (17.5,1.647)  | (16.27,1.605) | (17.67,1.458) | (17.33,1.421) |               |
| -2                  |            | None                          | (16.2,31)     | (18.08,2.133) | (18.12,2.124) | (18.04,2.123) | (16.94,2.036) | (8.27,1.731)  | (16.35,1.693) | (17.5,1.655)  | (17.35,1.589) | (17.67,1.536) |               |
|                     |            | 1                             | (16.03,2.281) | (18.08,2.198) | (18.12,2.193) | (18.04,2.186) | (16.96,2.118) | (16.84,2.085) | (16.82,2.083) | (17.41,1.716) | (17.45,1.715) | (17.67,1.606) |               |
|                     |            | 2                             | (18.08,2.251) | (18.12,2.247) | (16.06,2.245) | (18.04,2.243) | (18.16,2.237) | (16.96,2.213) | (16.82,2.157) | (17.16,2.11)  | (17.69,1.668) | (8.26,1.428)  |               |
|                     |            | 3                             | (18.16,2.33)  | (18.12,2.319) | (16.04,2.225) | (17.22,2.159) | (16.82,2.128) | (17.69,1.773) | (8.28,1.508)  | (16.63,1.451) | (19.3,1.394)  | (19.01,1.303) |               |
| SL-MoS <sub>2</sub> |            | None                          | (15.52,2.234) | (15.64,2.17)  | (16.7,2.169)  | (17.8,2.141)  | (8.3,2.011)   | (16.32,1.839) | (8.09,1.823)  | (16.03,1.518) | (17.31,1.409) | (17.39,1.398) |               |
|                     |            | 1                             | (16.7,2.252)  | (17.82,2.198) | (15.51,1.926) | (16.34,1.921) | (15.8,1.877)  | (7.99,1.719)  | (8.28,1.618)  | (17.03,1.526) | (17.07,1.525) | (17.31,1.481) |               |
|                     |            | 2                             | (16.74,2.32)  | (17.82,2.258) | (16.38,1.995) | (15.9,1.903)  | (17.1,1.706)  | (17.03,1.694) | (15.5,1.671)  | (7.93,1.667)  | (17.39,1.546) | (8.24,1.35)   |               |
|                     |            | 3                             | (16.76,2.383) | (17.84,2.309) | (17.1,1.903)  | (16.08,1.804) | (17.43,1.637) | (7.9,1.614)   | (15.27,1.48)  | (19.34,1.36)  | (19.02,1.352) | (18.67,1.26)  |               |
| 2                   |            | None                          | (16.7,2.252)  | (17.8,2.198)  | (15.51,1.926) | (16.34,1.921) | (15.8,1.877)  | (7.99,1.719)  | (8.28,1.618)  | (17.03,1.526) | (17.07,1.525) | (17.31,1.481) |               |
|                     |            | 1                             | (8.02,2.276)  | (16.46,2.263) | (15.3,2.085)  | (17.52,1.976) | (17.62,1.936) | (17.66,1.929) | (16.04,1.739) | (7.69,1.619)  | (14.01,1.28)  | (14.61,1.241) |               |
|                     |            | 2                             | (16.48,2.371) | (17.6,2.017)  | (17.64,2.014) | (17.56,2.012) | (17.68,2.003) | (8.1,983)     | (15.28,1.911) | (16.06,1.797) | (7.67,1.644)  | (16.85,1.355) |               |
|                     |            | 3                             | (16.5,2.421)  | (17.68,2.09)  | (17.64,2.084) | (15.26,1.772) | (7.98,1.73)   | (7.64,1.658)  | (16.93,1.486) | (16.85,1.485) | (16.89,1.483) | (17.07,1.466) |               |
| 4                   |            | None                          | (16.54,2.458) | (17.72,2.151) | (7.63,1.666)  | (15.24,1.644) | (16.93,1.642) | (16.87,1.642) | (17.09,1.609) | (7.96,1.515)  | (18.78,1.375) | (19.02,1.333) |               |
|                     |            | 1                             | (16.54,2.403) | (17.7,2.06)   | (17.74,2.056) | (18.14,1.866) | (18.1,1.862)  | (15.28,1.676) | (16.87,1.639) | (16.93,1.638) | (17.05,1.617) | (7.98,1.604)  |               |
|                     |            | 2                             | (7.74,3.113)  | (16.24,2.264) | (17.42,1.904) | (17.62,1.784) | (17.58,1.78)  | (15.42,1.746) | (15.86,1.727) | (17.98,1.282) | (14.63,1.238) | (18.72,1.22)  |               |
|                     |            | 3                             | (7.71,2.842)  | (16.28,2.333) | (17.46,1.925) | (17.42,1.917) | (17.6,1.863)  | (17.64,1.858) | (15.4,1.609)  | (15.18,1.571) | (17.98,1.351) | (18.72,1.26)  |               |
| 6                   |            | None                          | (7.69,2.597)  | (16.32,2.393) | (17.5,1.98)   | (17.46,1.972) | (17.6,1.95)   | (17.64,1.943) | (15.1,1.524)  | (15.38,1.505) | (16.73,1.326) | (18.68,1.32)  |               |
|                     |            | 1                             | (16.34,2.447) | (7.67,2.366)  | (17.52,2.047) | 17.7,2.044)   | (17.66,2.037) | (17.62,2.024) | (17.14,1.818) | (15.06,1.481) | (16.73,1.465) | (18.6,1.398)  |               |
|                     |            | 2                             | (16.32,2.385) | (7.72,2.265)  | (17.7,1.992)  | (17.66,1.986) | (17.6,1.968)  | (17.54,1.967) | (17.5,1.962)  | (17.18,1.851) | (17.96,1.807) | (15.4,1.521)  |               |
|                     |            | 3                             | (7.56,2.72)   | (16.06,2.047) | (15.86,1.906) | (15.34,1.813) | (17.28,1.779) | (17.12,1.722) | (16.84,1.49)  | (14.44,1.454) | (17.7,1.426)  | (18.46,1.269) |               |
| 8                   |            | None                          | (7.5,2.549)   | (16.1,2.123)  | (17.24,1.819) | (17.2,1.817)  | (17.28,1.814) | (15.32,1.665) | (14.46,1.368) | (18.46,1.326) | (16.57,1.127) | (18.09,1.10)  |               |
|                     |            | 1                             | (7.46,2.401)  | (16.14,2.175) | (17.28,1.875) | (17.24,1.873) | (17.04,1.802) | (15.28,1.571) | (18.46,1.394) | (14.48,1.29)  | (16.55,1.268) | (18.11,1.188) |               |
|                     |            | 2                             | (7.42,2.273)  | (16.18,2.252) | (15.92,2.101) | (17.34,1.927) | (17.1,867)    | (15.25,1.509) | (18.46,1.465) | (16.57,1.413) | (18.11,1.273) | (14.5,1.21)   |               |
|                     |            | 3                             | (16.16,2.218) | (15.94,2.183) | (7.62,2.067)  | (17.38,1.877) | (17.02,1.855) | (17.74,1.845) | (17.2,1.837)  | (17.16,1.834) | (7.34,1.69)   | (15.3,1.578)  |               |
| 8                   |            | None                          | (7.19,3.119)  | (7.5,2.645)   | (15.64,2.055) | (15.9,1.83)   | (17.42,1.644) | (17.02,1.641) | (16.98,1.636) | (17.06,1.635) | (14.18,1.632) |               |               |
|                     |            | 1                             | (7.18,3.158)  | (7.48,2.292)  | (7.42,2.272)  | (15.66,2.005) | (15.96,1.853) | (17.08,1.732) | (17.04,1.727) | (15.16,1.653) | (17.44,1.629) | (16.62,1.617) |               |
|                     |            | 2                             | (7.17,3.156)  | (15.68,1.963) | (16.04,1.906) | (17.1,1.813)  | (16.64,1.689) | (17.44,1.644) | (15.14,1.562) | (18.16,1.384) | (14.16,1.29)  | (16.35,1.285) |               |
|                     |            | 3                             | (7.16,3.134)  | (16.08,1.999) | (15.7,1.963)  | (17.14,1.87)  | (16.64,1.792) | (17.4,1.702)  | (15.12,1.502) | (18.14,1.467) | (16.35,1.413) | (17.83,1.322) |               |
|                     | 4          | (7.15,2.643)                  | (15.72,2.036) | (16.04,1.968) | (17.2,1.837)  | (7.56,1.808)  | (17.56,1.743) | (16.68,1.727) | (15.13,1.547) | (18.18,1.529) | (18.14,1.527) |               |               |
